# Supplementary material
Source: PubMed Central journal article supplement (PMC6640746)
Supplement: ao6b00237_si_001.pdf [file ao6b00237_si_001.pdf]

# **Supporting Information**

## **Copper Bispidines Complexes – Synthesis and Complex Stability Study**

Aleksei V. Medved'ko, Bayirta V. Egorova, Alina A. Komarova, Rustem D. Rakhimov, Dmitry P. Krut'ko, Stepan N. Kalmykov, Sergey Z. Vatsadze

## Contents

|                                                                                            |     |
|--------------------------------------------------------------------------------------------|-----|
| Titration curves for ligand <b>1c</b>                                                      | S2  |
| Titration curves for ligand <b>2a</b>                                                      | S3  |
| Titration curves for ligand <b>2c</b>                                                      | S4  |
| Titration curves for ligand <b>3b</b>                                                      | S5  |
| Titration curves for ligand <b>3c</b>                                                      | S6  |
| Stoichiometry of complex $\text{Cu}^{2+}:\mathbf{1c}$ determination by UV-vis spectrometry | S8  |
| NMR spectra                                                                                | S9  |
| ATR-FTIR spectra of compounds <b>3b</b> and <b>5b</b> , <b>3c</b> and <b>5c</b>            | S22 |
| UV-vis spectrum of compound <b>4b</b>                                                      | S23 |
| HRMS-ESI of copper complexes <b>4b</b> and <b>4c</b>                                       | S23 |
| CV curves for complexes <b>4b</b> and <b>5c</b>                                            | S24 |

### Protonation of Ligand **1c**

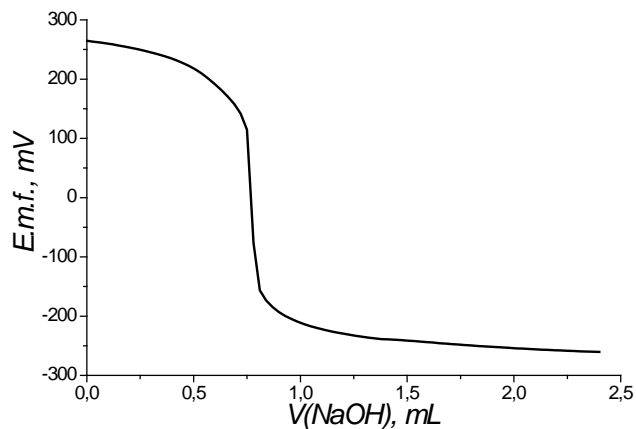

**Figure S1.** Titration curve of **1c** (0.001M) acidified by excess of  $\text{HClO}_4$  (0.004M),  $I=0.1 \text{ M KNO}_3$

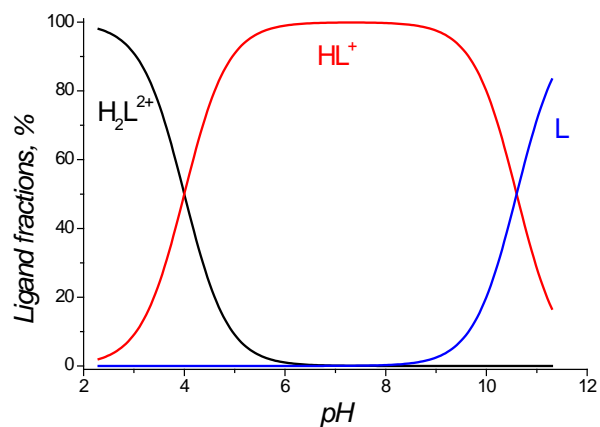

**Figure S2.** Species distribution for **1c** (0.001M),  $I=0.1 \text{ M KNO}_3$

### Complex of Ligand **1c** with $\text{Cu}^{2+}$

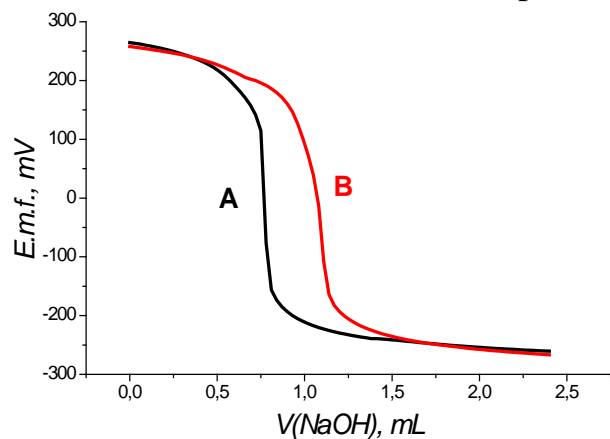

**Figure S3.** Titration curves: A- **1c** (0.001M) acidified by excess of  $\text{HClO}_4$  (0.004M), B- **1a** (0.001M) with  $\text{Cu}^{2+}$  (0.0005M) acidified by excess of  $\text{HClO}_4$  (0.004M),  $I=0.1 \text{ M KNO}_3$

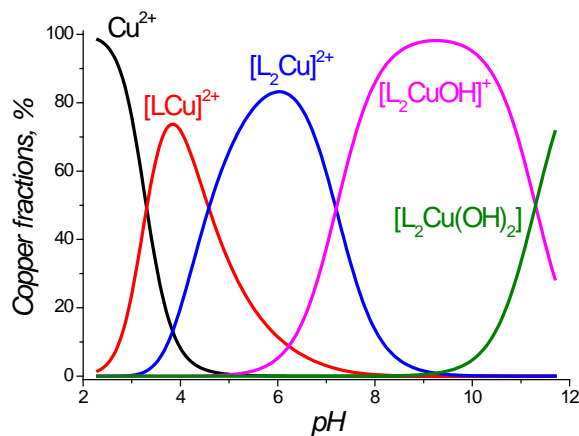

**Figure S4.** Species distribution in the system: **1c** (0.001M) and  $\text{Cu}^{2+}$  (0.0005M),  $I=0.1 \text{ M KNO}_3$

### Protonation of Ligand 2a

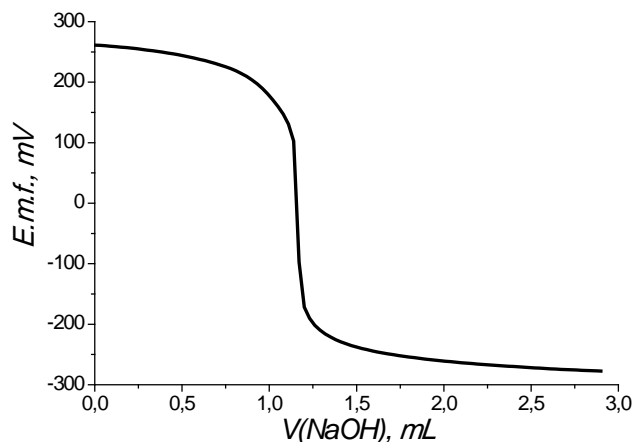

**Figure S5.** Titration curve of the **2a** (0.001M) acidified by excess of  $\text{HClO}_4$  (0.004M),  $I=0.1 \text{ M KNO}_3$

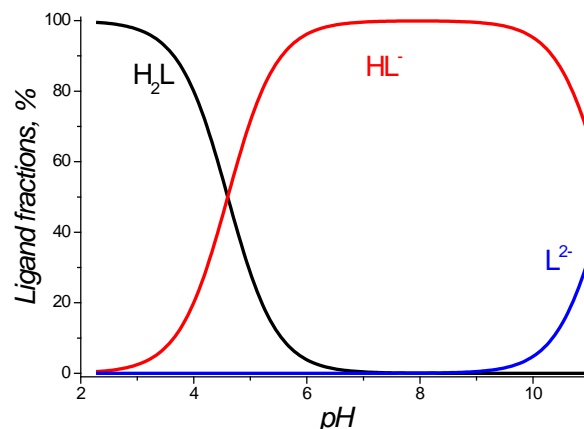

**Figure S6.** Species distribution for **2a** (0.001M),  $I=0.1 \text{ M KNO}_3$

### Complex of Ligand 2a with $\text{Cu}^{2+}$

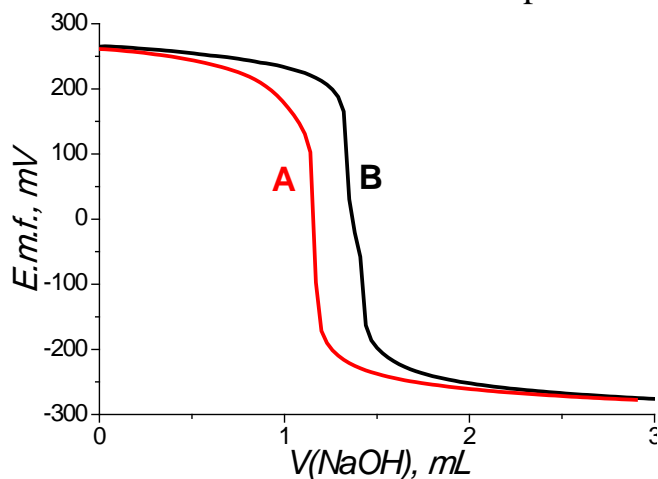

**Figure S7.** Titration curves of (A) the **2a** (0.001M) acidified by excess of  $\text{HClO}_4$  (0.004M) and (B) the **2a** (0.001M) with  $\text{Cu}^{2+}$  (0.001M) acidified by excess of  $\text{HClO}_4$  (0.004M),  $I=0.1 \text{ M KNO}_3$

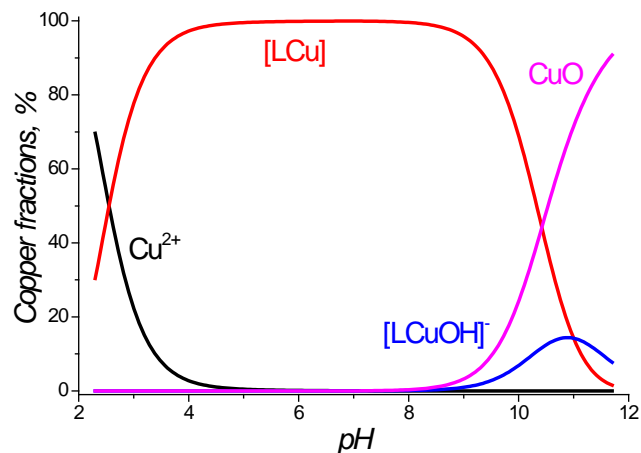

**Figure S8.** Species distribution in the system: **2a** (0.001M) and  $\text{Cu}^{2+}$  (0.001M),  $I=0.1 \text{ M KNO}_3$

### Protonation of Ligand **2c**

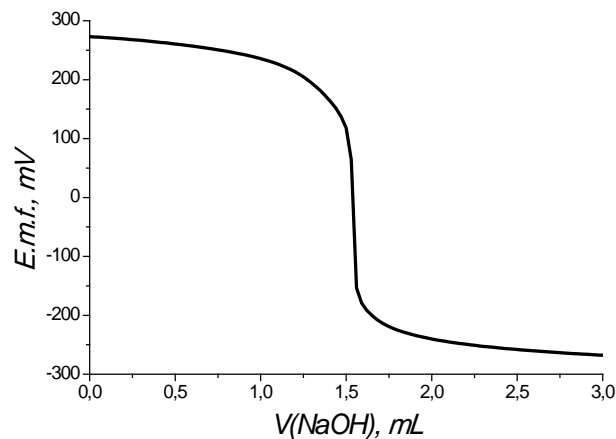

**Figure S9.** Titration curve of the **2c** (0.001M) acidified by excess of  $\text{HClO}_4$  (0.004M),  $I=0.1 \text{ M KNO}_3$

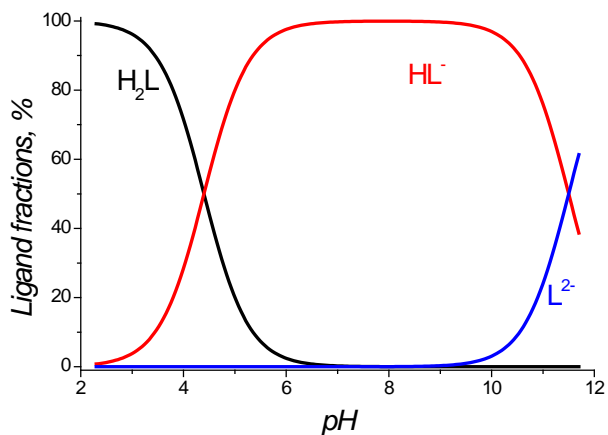

**Figure S10.** Species distribution for **2c** (0.001M),  $I=0.1 \text{ M KNO}_3$

### Complex of Ligand **2c** with $\text{Cu}^{2+}$

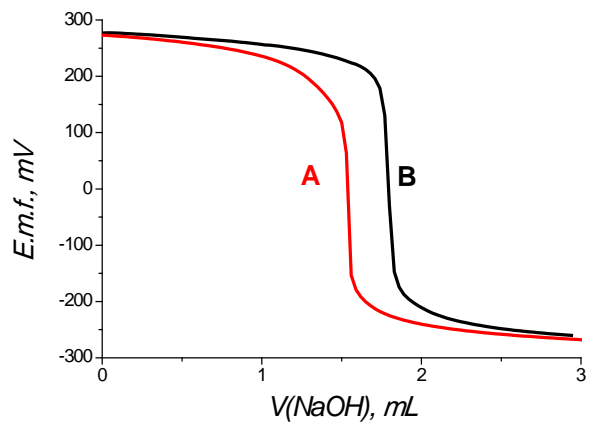

**Figure S11.** Titration curves of (A) the **2c** (0.001M) acidified by excess of  $\text{HClO}_4$  (0.004M) and (B) the **2c** (0.001M) with  $\text{Cu}^{2+}$  (0.001M) acidified by excess of  $\text{HClO}_4$  (0.004M),  $I=0.1 \text{ M KNO}_3$

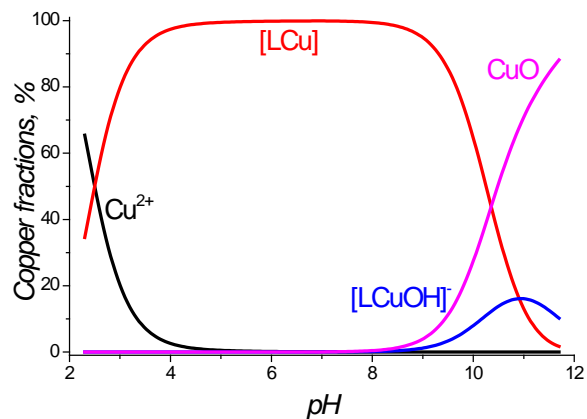

**Figure S12.** Species distribution curves in the system: **2c** (0.001M) and  $\text{Cu}^{2+}$  (0.001M),  $I=0.1 \text{ M KNO}_3$

### Protonation of Ligand **3b**

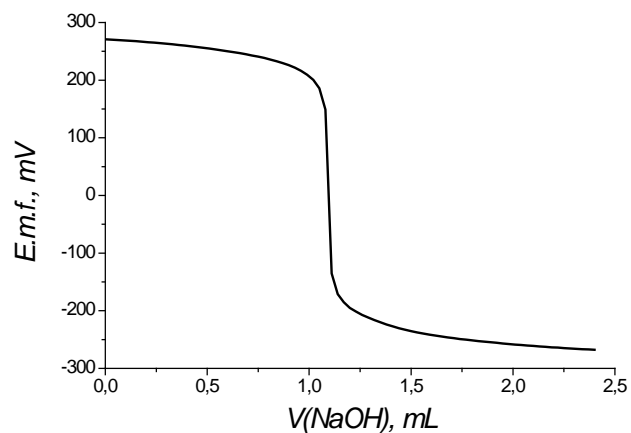

**Figure S13.** Titration curve of the **3b** (0.001M) acidified by excess of  $\text{HClO}_4$  (0.004M),  $I=0.1 \text{ M KNO}_3$

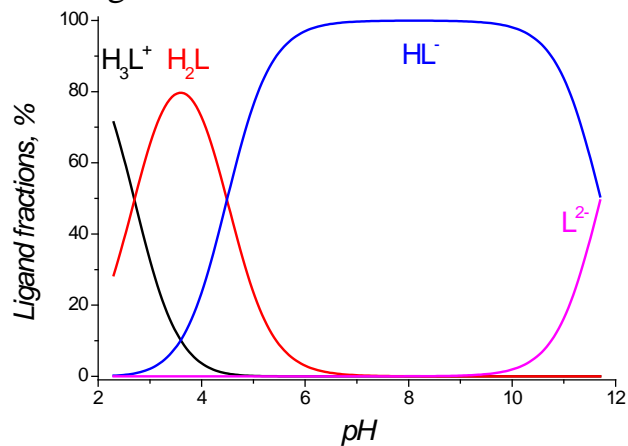

**Figure S14.** Species distribution for **3b** (0.001M),  $I=0.1 \text{ M KNO}_3$

### Complex of Ligand **3b** with $\text{Cu}^{2+}$

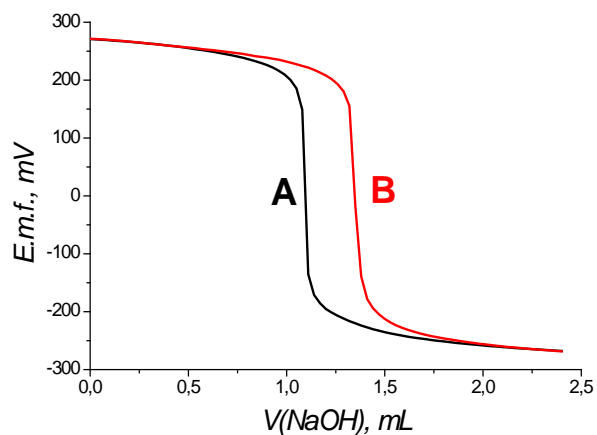

**Figure S15.** Titration curves of (A) the **3b** (0.001M) acidified by excess of  $\text{HClO}_4$  (0.004M) and (B) the **3b** (0.001M) with  $\text{Cu}^{2+}$  (0.001M) acidified by excess of  $\text{HClO}_4$  (0.004M),  $I=0.1 \text{ M KNO}_3$

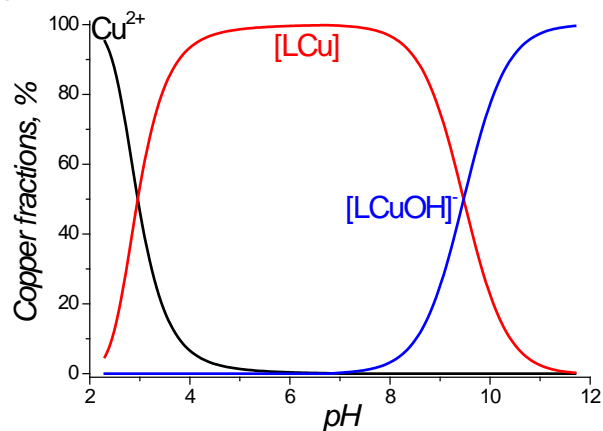

**Figure S16.** Species distribution curves in the system: **3b** (0.001M) and  $\text{Cu}^{2+}$  (0.001M),  $I=0.1 \text{ M KNO}_3$

### Protonation of Ligand 3c

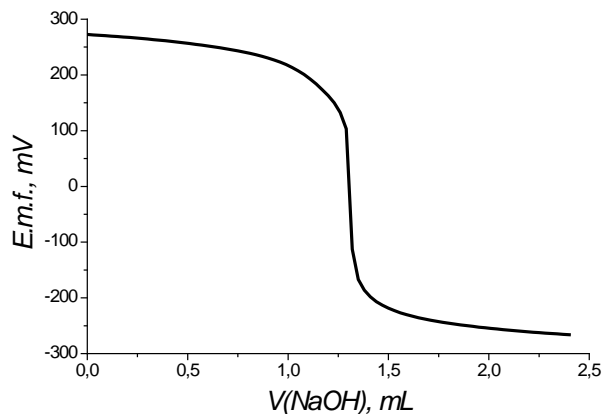

**Figure S17.** Titration curve of the **3c** (0.001M) acidified by excess of  $\text{HClO}_4$  (0.004M),  $I=0.1 \text{ M KNO}_3$

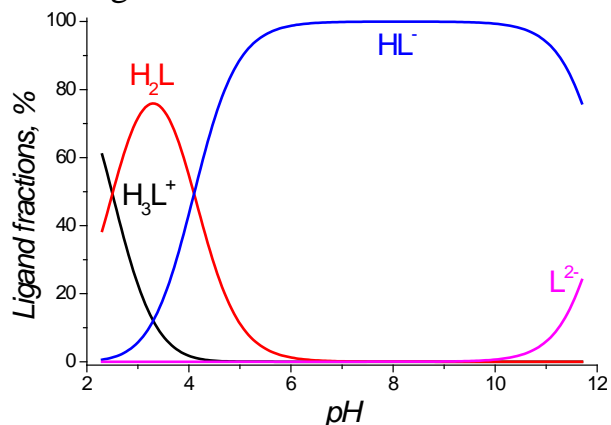

**Figure S18.** Species distribution for **3c** (0.001M),  $I=0.1 \text{ M KNO}_3$

### Complex of Ligand 3c with $\text{Cu}^{2+}$

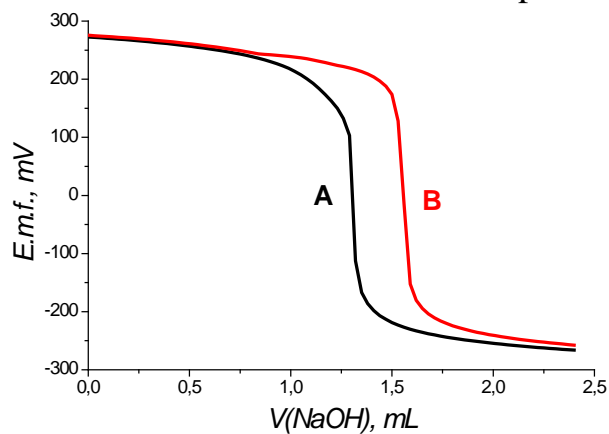

**Figure S19.** Titration curves of (A) the **3c** (0.001M) acidified by excess of  $\text{HClO}_4$  (0.004M) and (B) the **3c** (0.001M) with  $\text{Cu}^{2+}$  (0.001M) acidified by excess of  $\text{HClO}_4$  (0.004M),  $I=0.1 \text{ M KNO}_3$

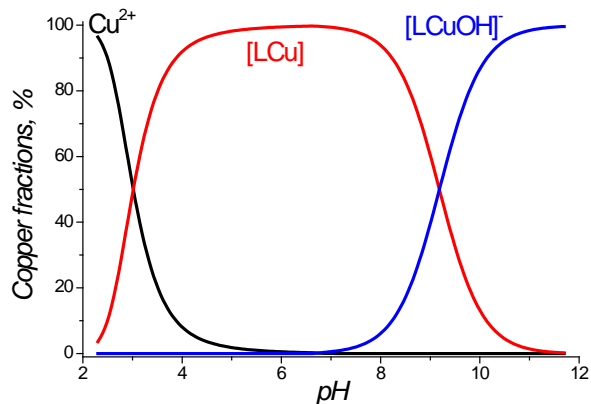

**Figure S20.** Species distribution curves in the system: **3c** (0.001M) and  $\text{Cu}^{2+}$  (0.001M),  $I=0.1 \text{ M KNO}_3$

Stoichiometry of complex  $\text{Cu}^{2+}:\mathbf{1c}$ : determination by UV-vis spectrophotometry

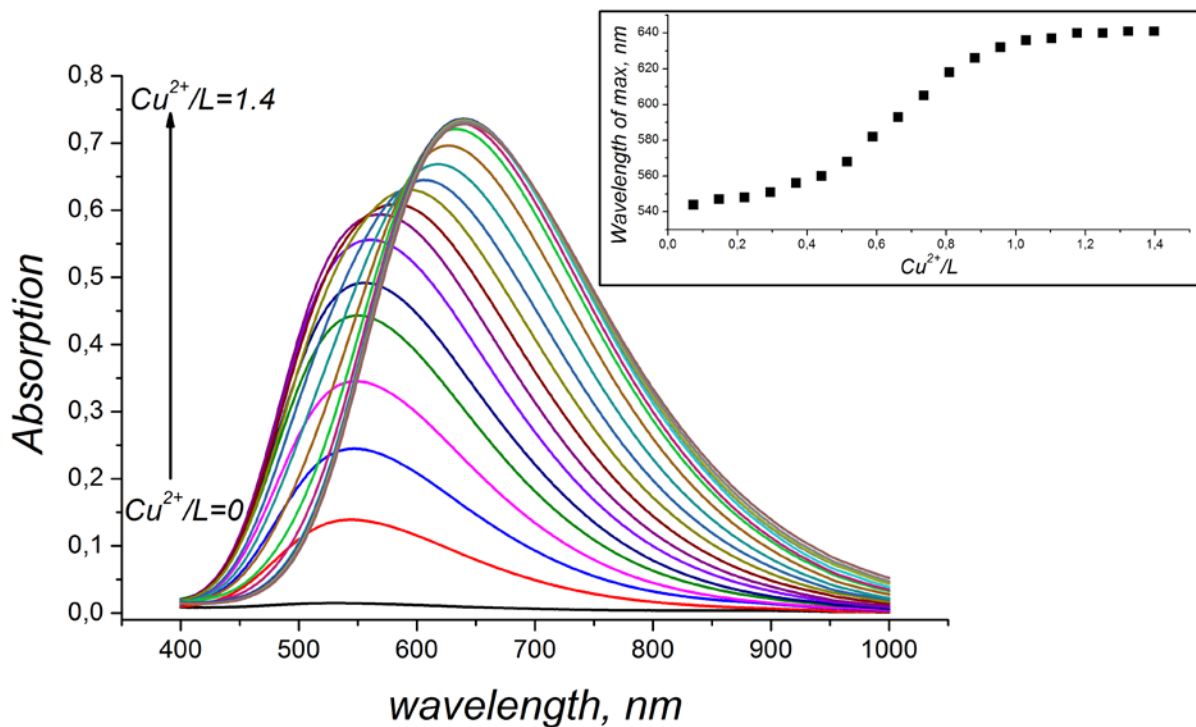

**Figure S21.** Evolution of absorption spectra upon addition of  $\text{Cu}^{2+}$  and absorption maximum shift with  $\text{Cu}^{2+}/\text{L}$  variation (inset),  $\text{L}=\mathbf{1c}$

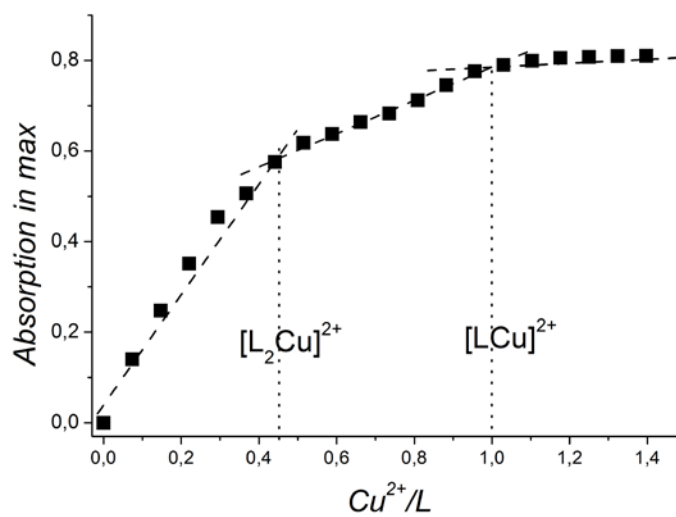

**Figure S22.** Absorption maximum shift with  $\text{Cu}^{2+}/\text{L}$  variation,  $\text{L}=\mathbf{1c}$



## NMR spectra

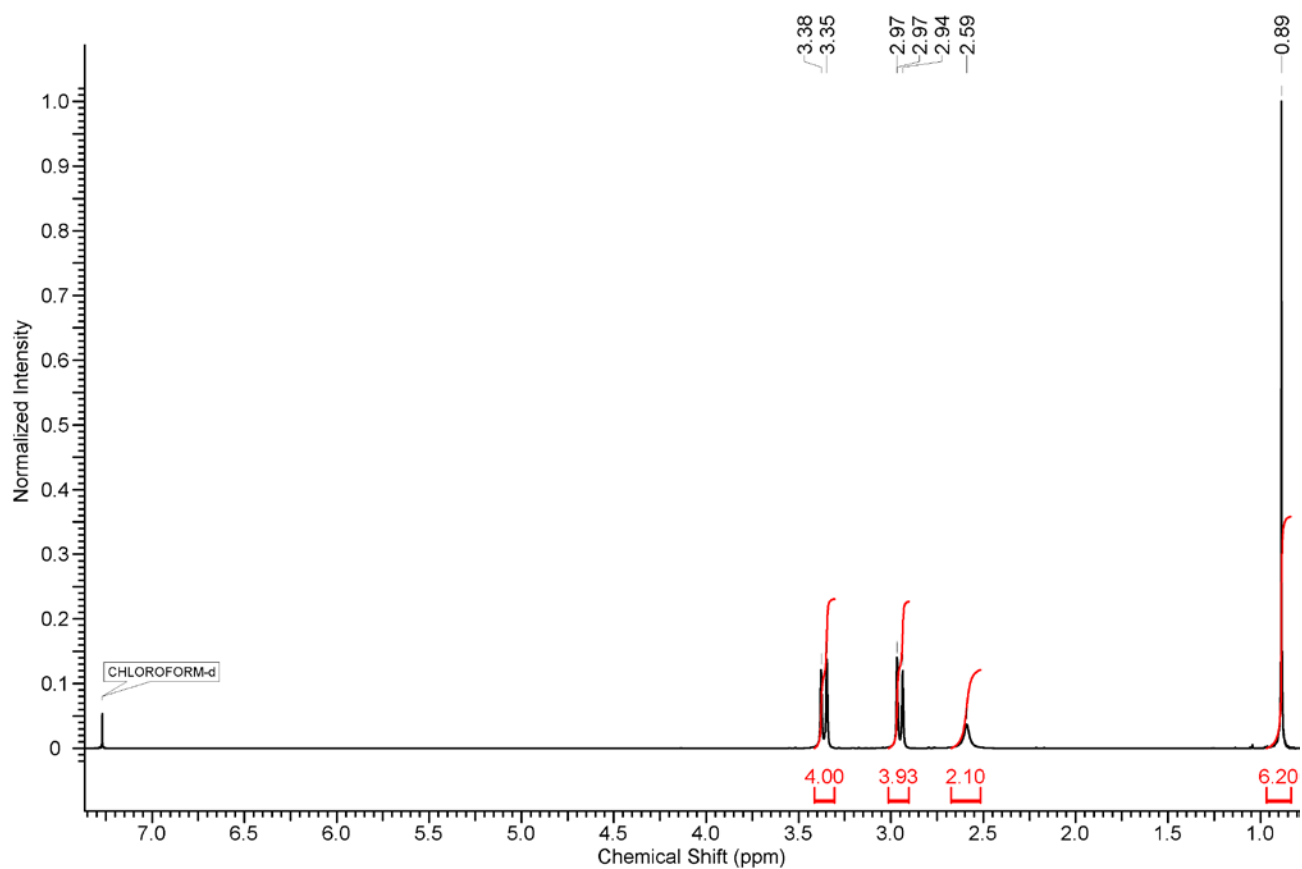

**Figure S23.** <sup>1</sup>H-NMR spectrum of 1,5-dimethyl-9-oxo-3,7-diazabicyclo[3.3.1]nonane (**1b**) in chloroform-d<sub>1</sub>.

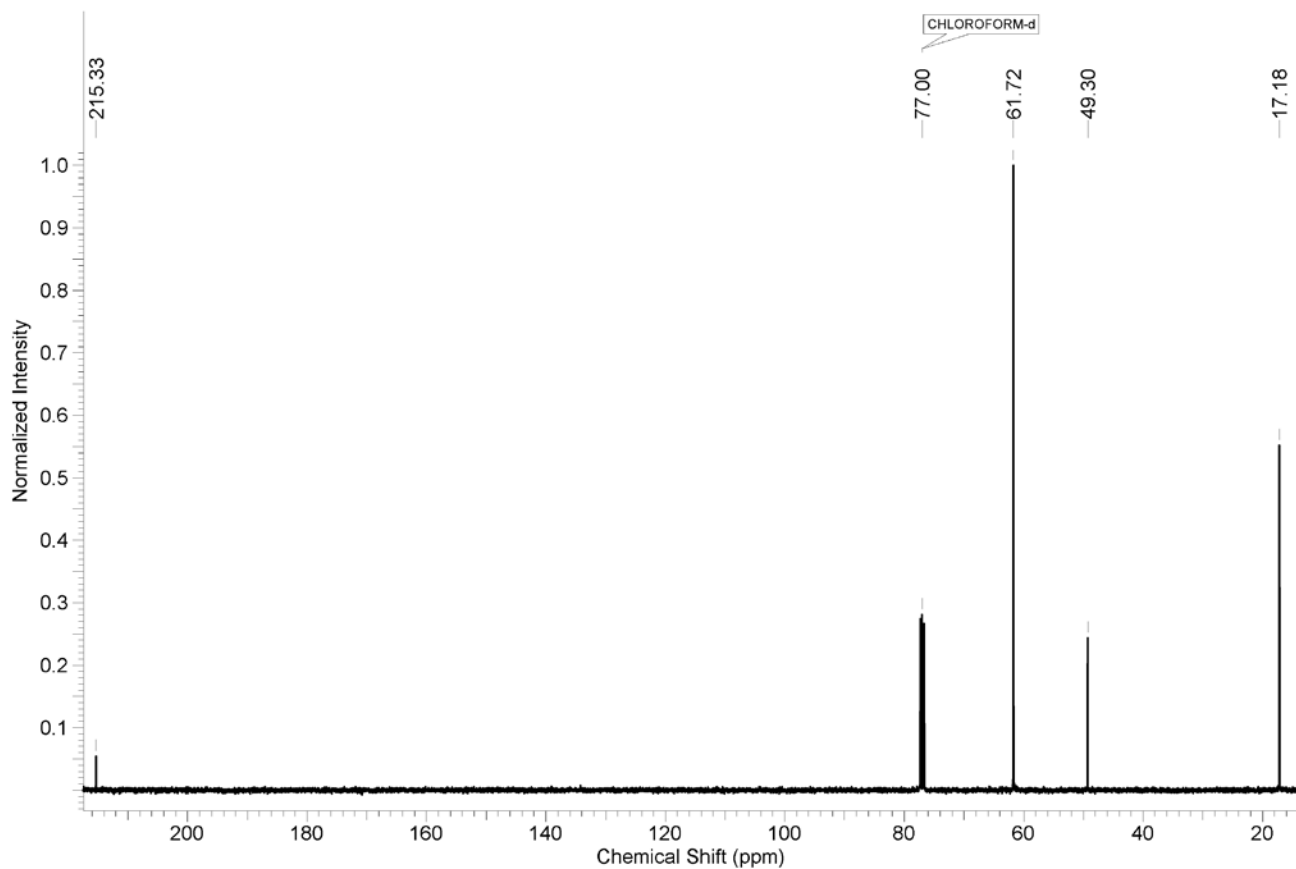

**Figure S24.**  $^{13}\text{C}$ -NMR spectrum of 1,5-dimethyl-9-oxo-3,7-diazabicyclo[3.3.1]nonane (**1b**) in chloroform-d1.

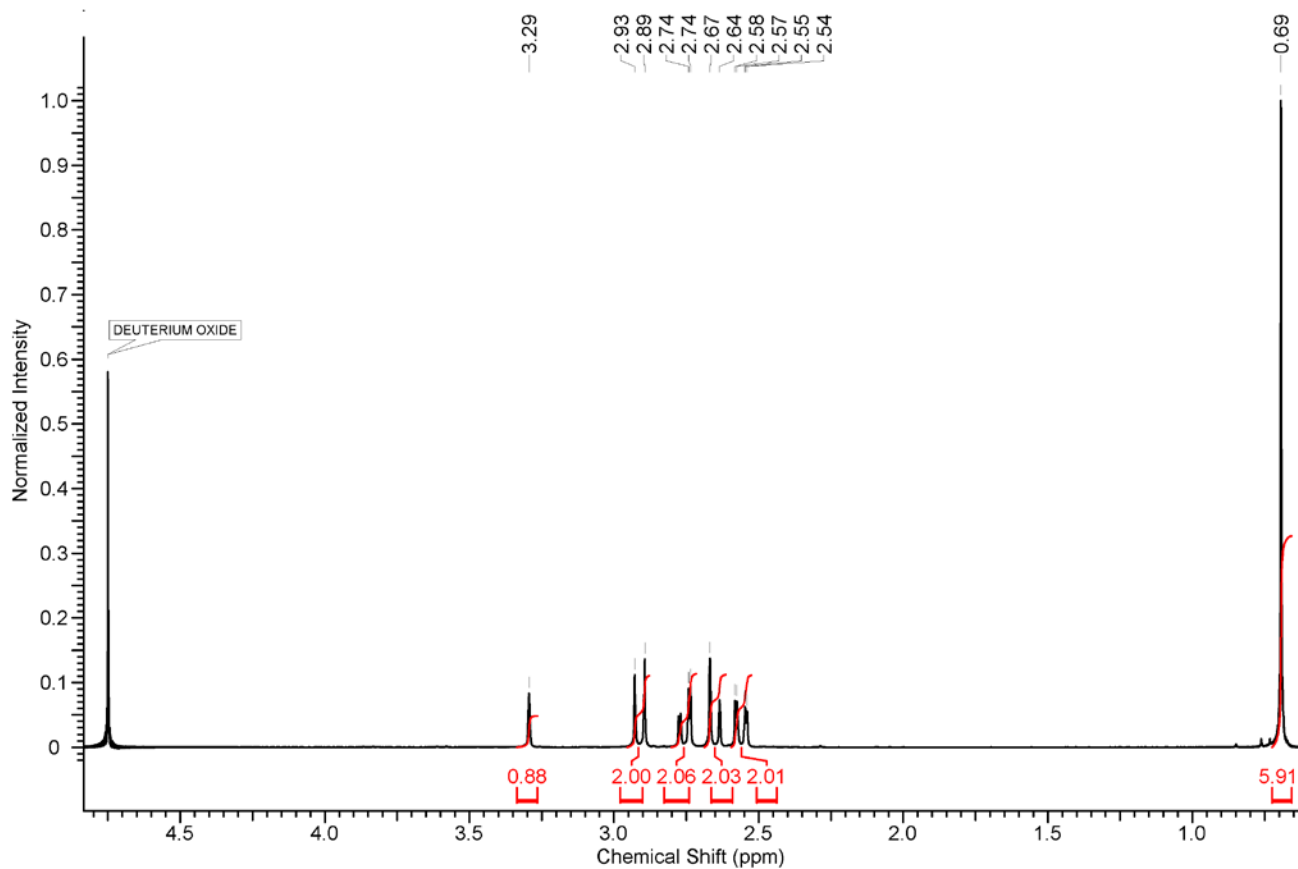

**Figure S25.**  $^1\text{H-NMR}$  spectrum of 1,5-dimethyl-9-hydroxy-3,7-diazabicyclo[3.3.1]nonane (**1c**) in water- $\text{d}_2$ .

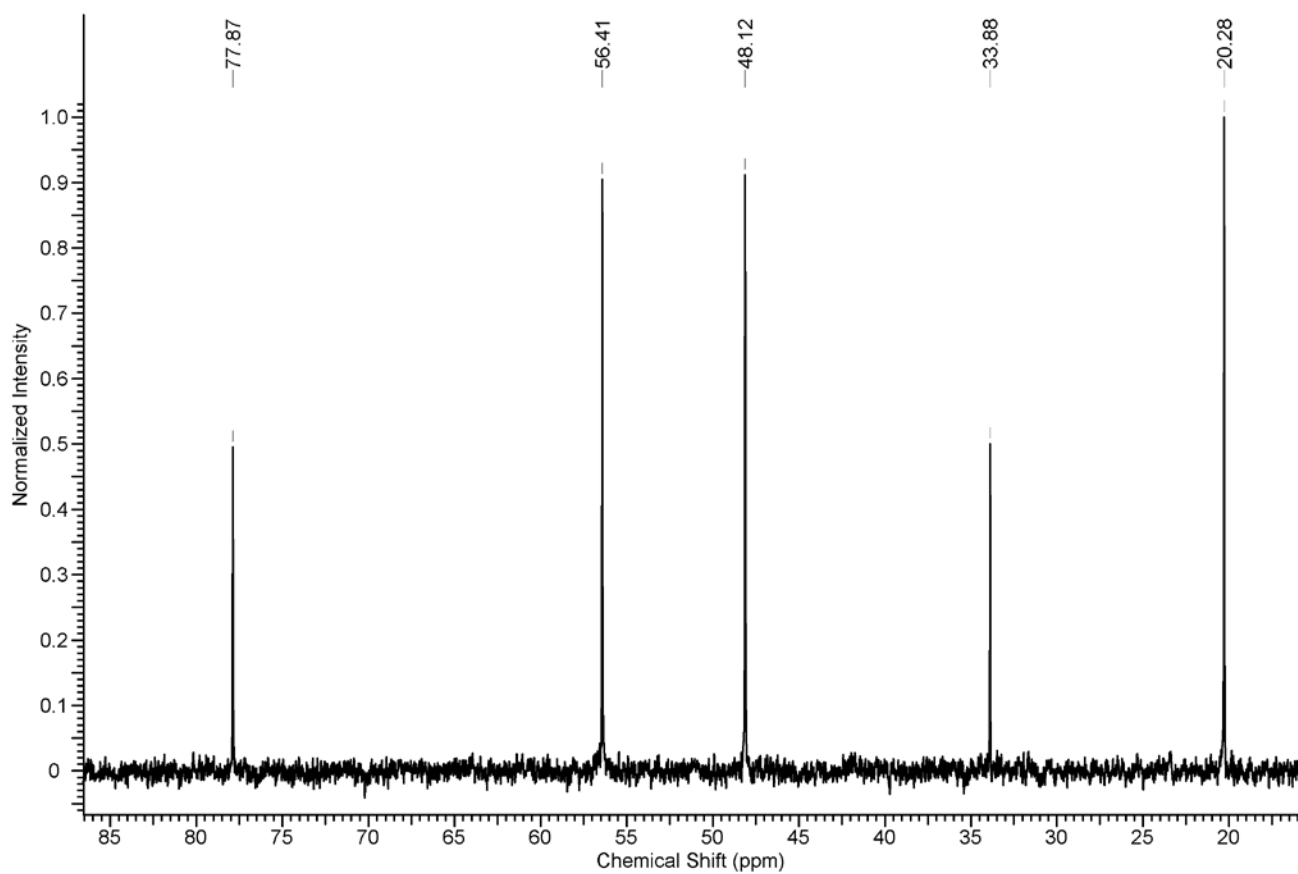

**Figure S26.**  $^{13}\text{C}$ -NMR spectrum of 1,5-dimethyl-9-hydroxy-3,7-diazabicyclo[3.3.1]nonane (**1c**) in water- $\text{d}_2$ .

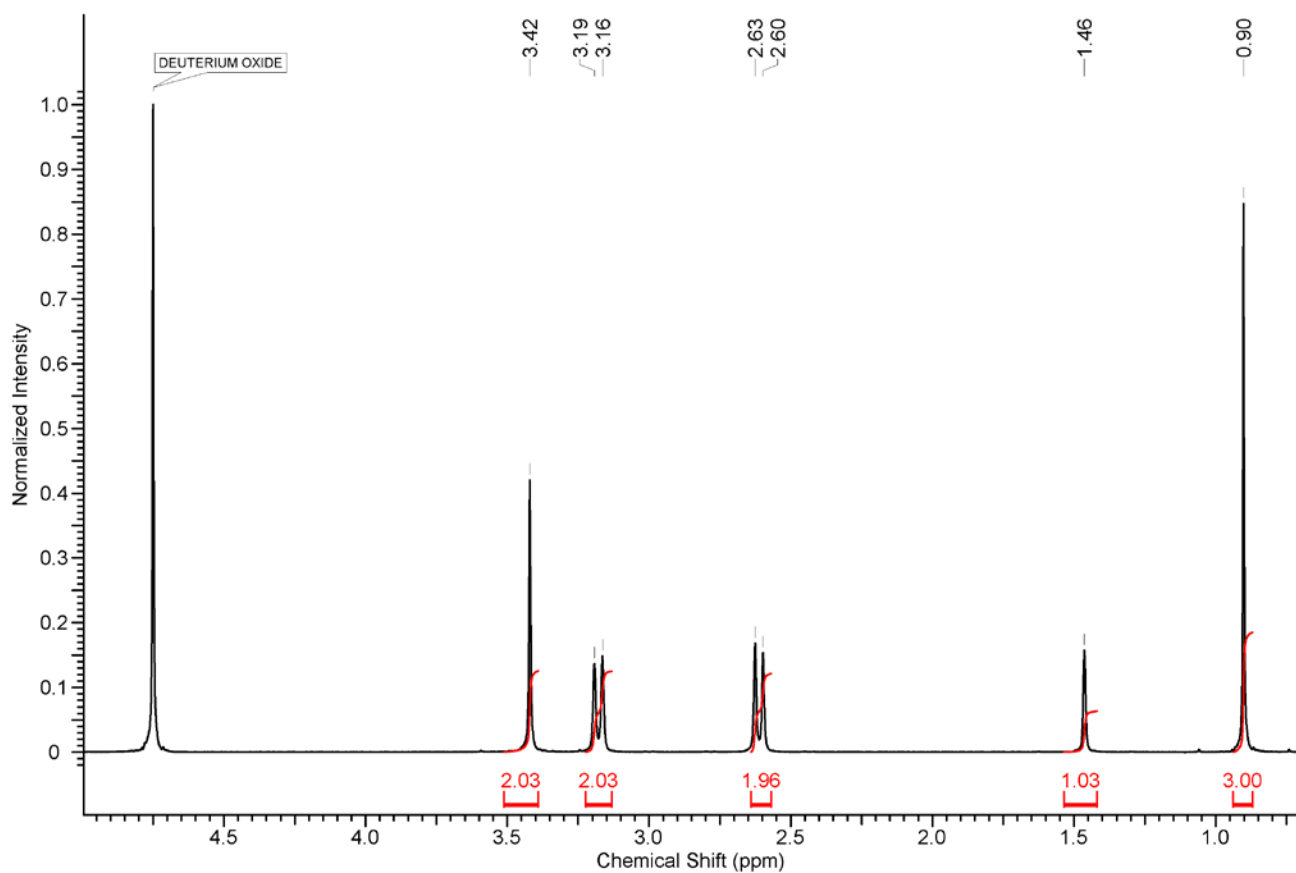

**Figure S27.** <sup>1</sup>H-NMR spectrum of 2,2'-(1,5-dimethyl-3,7-diazabicyclo[3.3.1]nonane-3,7-diyl)diacetic acid (**2a**) in water-d<sub>2</sub>.

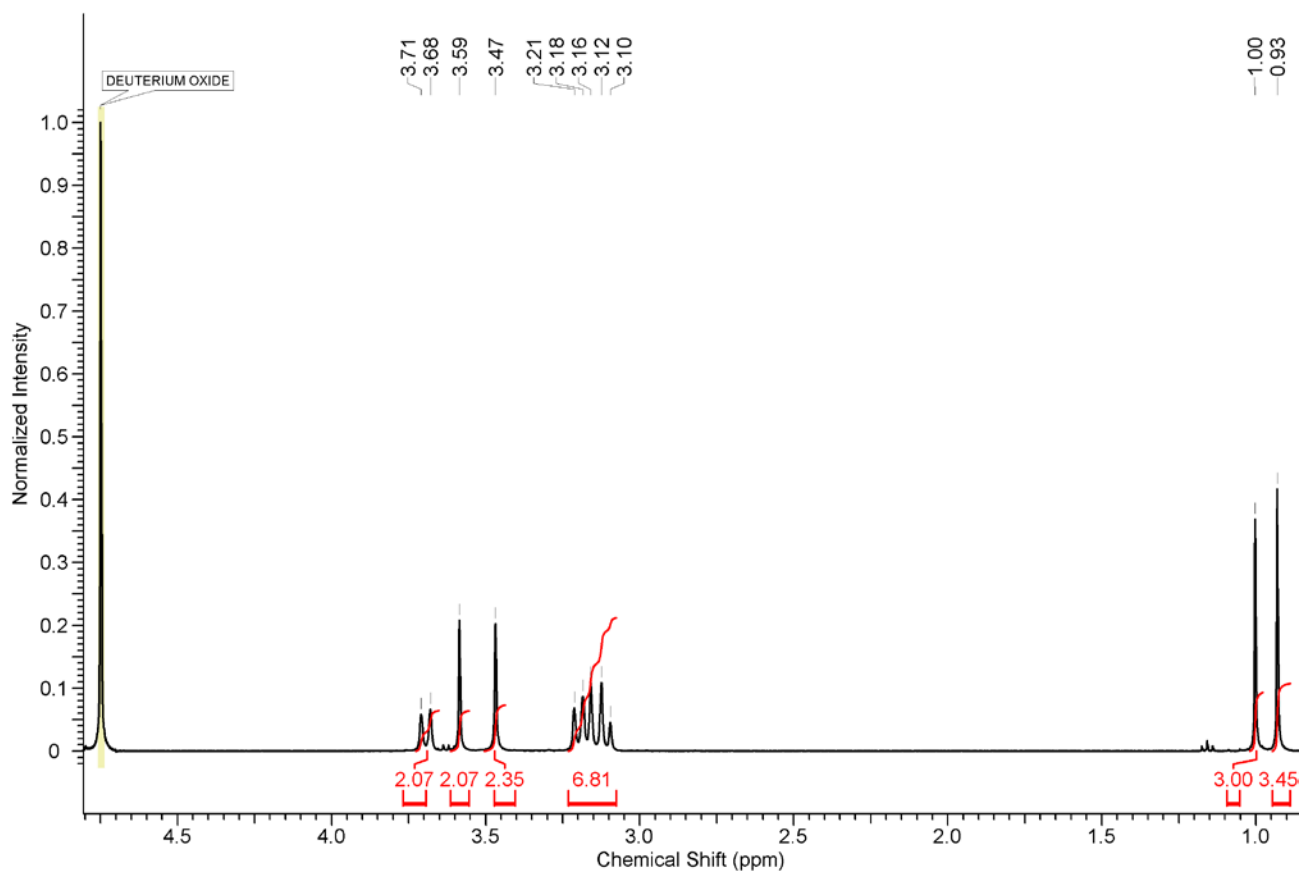

**Figure S28.**  $^1\text{H-NMR}$  spectrum of 2,2'-(1,5-dimethyl-9-oxo-3,7-diazabicyclo[3.3.1]nonane-3,7-diyl)diacetic acid (**2b**) in water- $\text{d}_2$ .

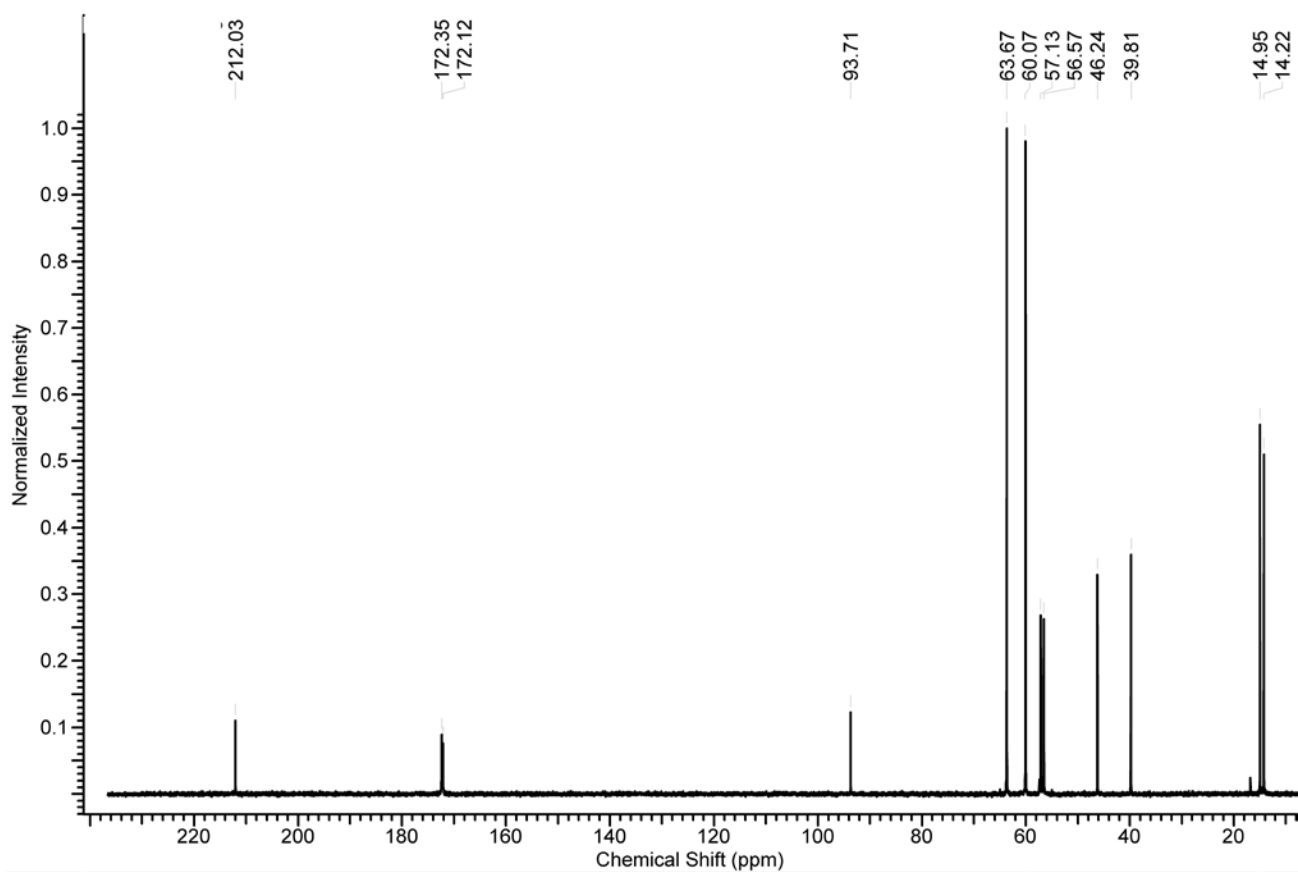

**Figure S29.**  $^{13}\text{C}$ -NMR spectrum of 2,2'-(1,5-dimethyl-9-oxo-3,7-diazabicyclo[3.3.1]nonane-3,7-diyl)diacetic acid (**2b**) in water- $\text{d}_2$ .

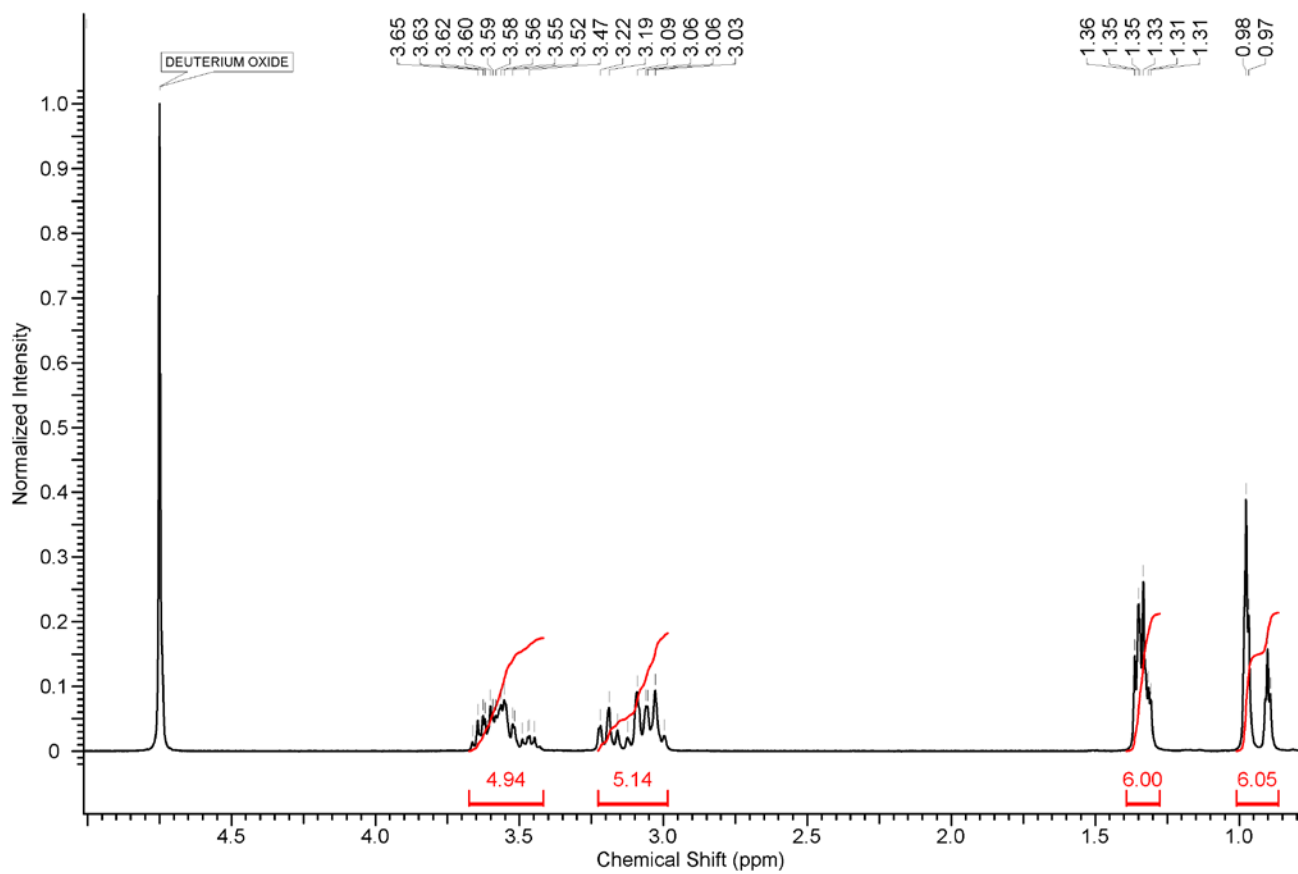

**Figure S30.**  $^1\text{H-NMR}$  spectrum of 2,2'-(1,5-dimethyl-9-oxo-3,7-diazabicyclo[3.3.1]nonane-3,7-diyl)dipropionic acid (**3b**) in water- $\text{d}_2$ .



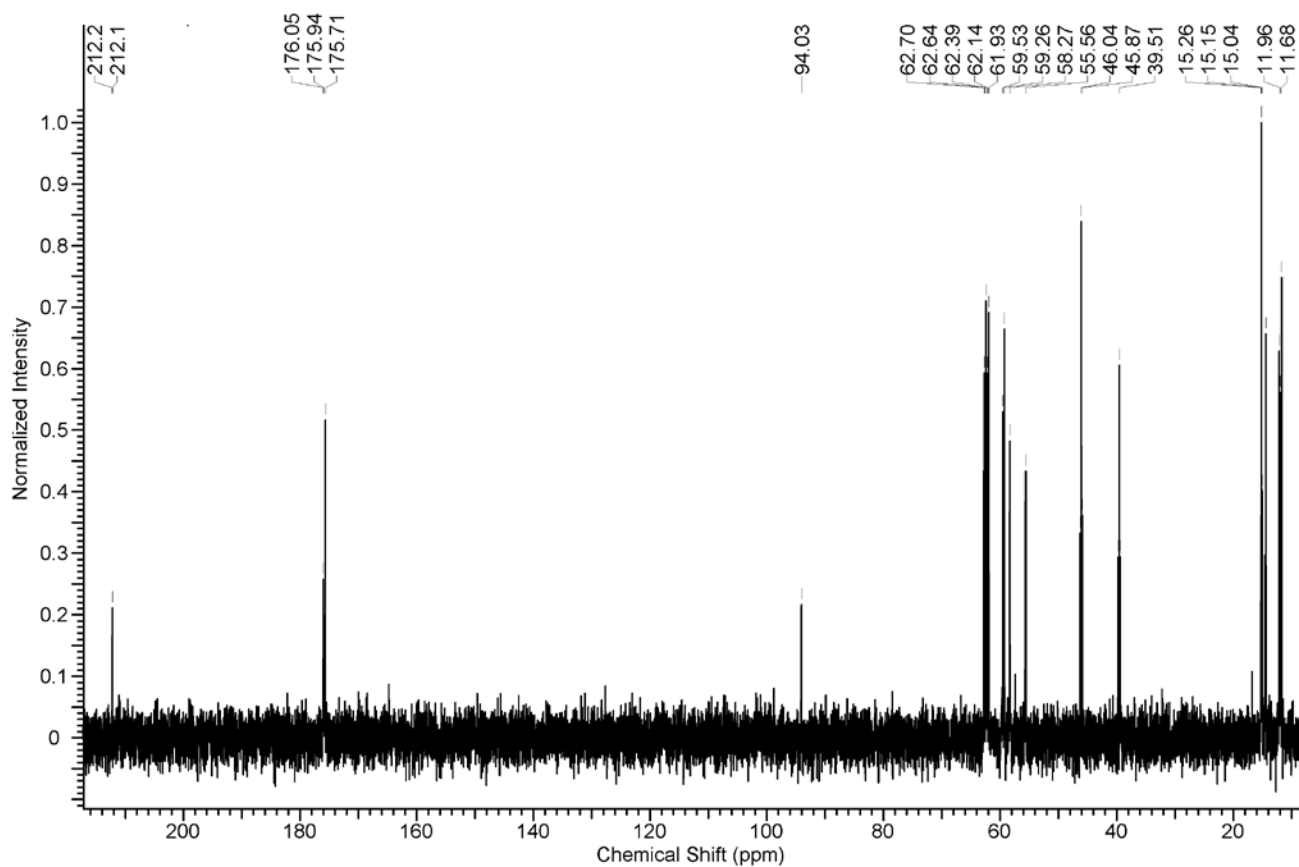

**Figure S31.**  $^{13}\text{C}$ -NMR spectrum of 2,2'-(1,5-dimethyl-9-oxo-3,7-diazabicyclo[3.3.1]nonane-3,7-diyl)dipropionic acid (**3b**) in water- $\text{d}_2$ .

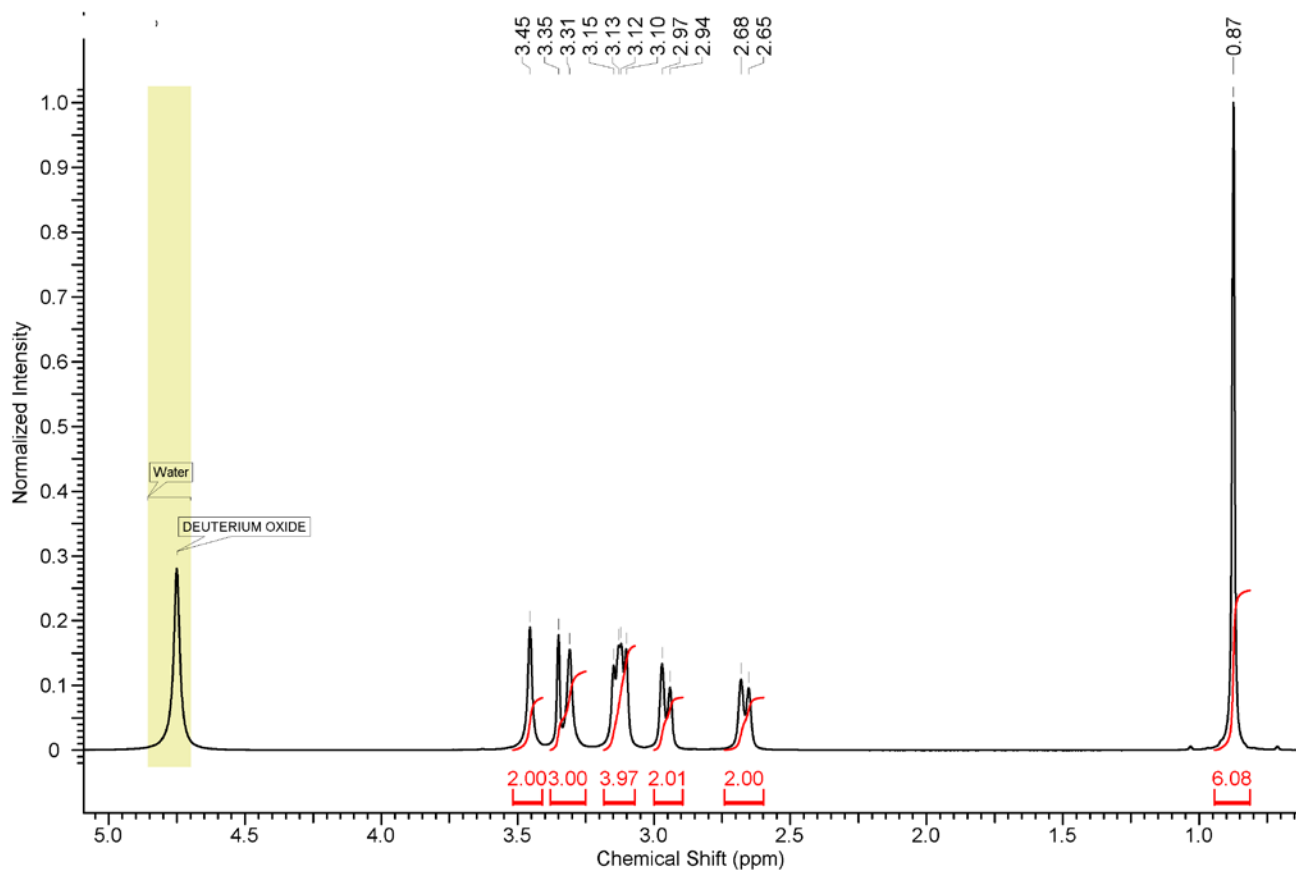

**Figure S32.**  $^1\text{H-NMR}$  spectrum of 2,2'-(1,5-dimethyl-9-hydroxy-3,7-diazabicyclo[3.3.1]nonane-3,7-diyl)diacetic acid (**2c**) in water- $\text{d}_2$ .

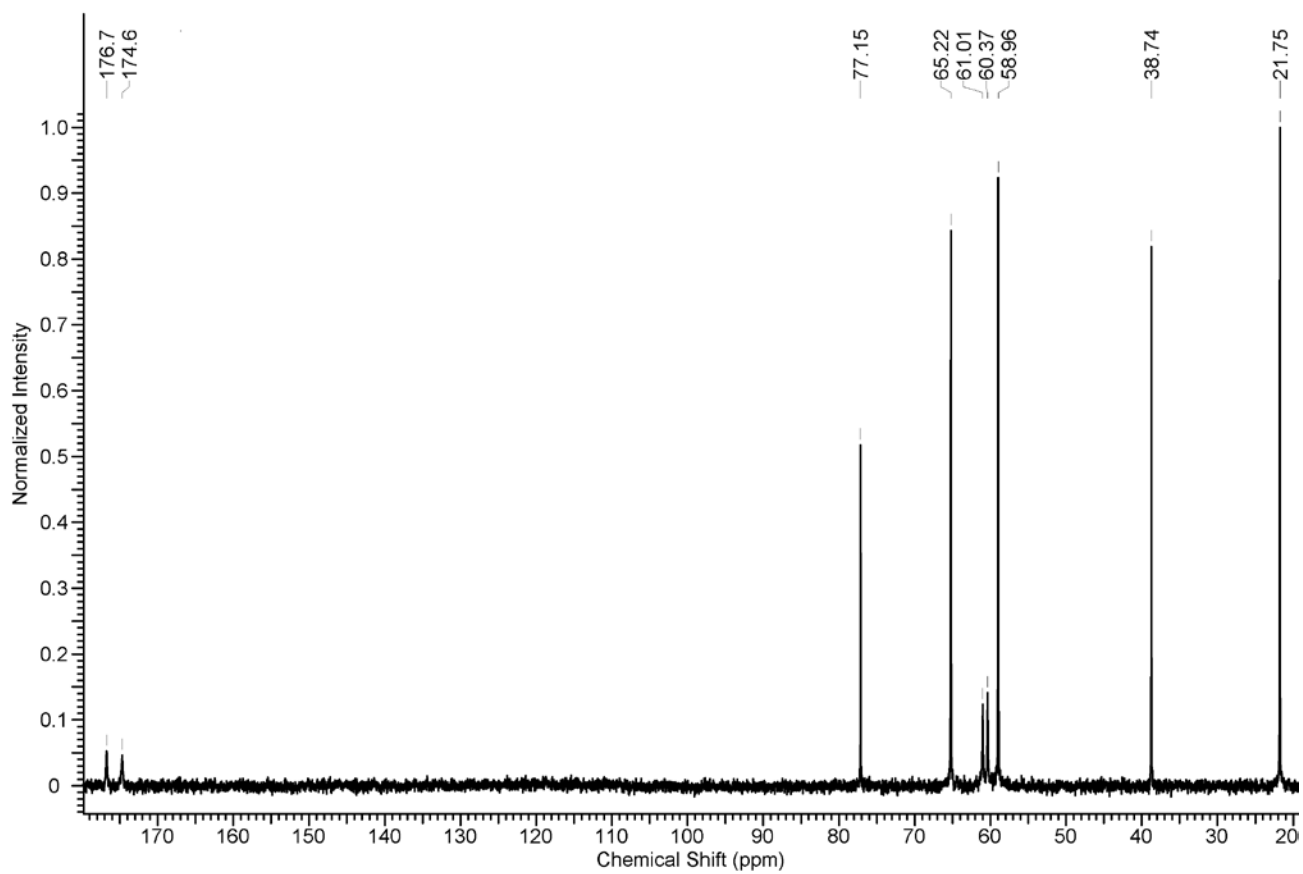

**Figure S33.**  $^{13}\text{C}$ -NMR spectrum of 2,2'-(1,5-dimethyl-9-hydroxy-3,7-diazabicyclo[3.3.1]nonane-3,7-diyl)diacetic acid (**2c**) in water- $\text{d}_2$ .

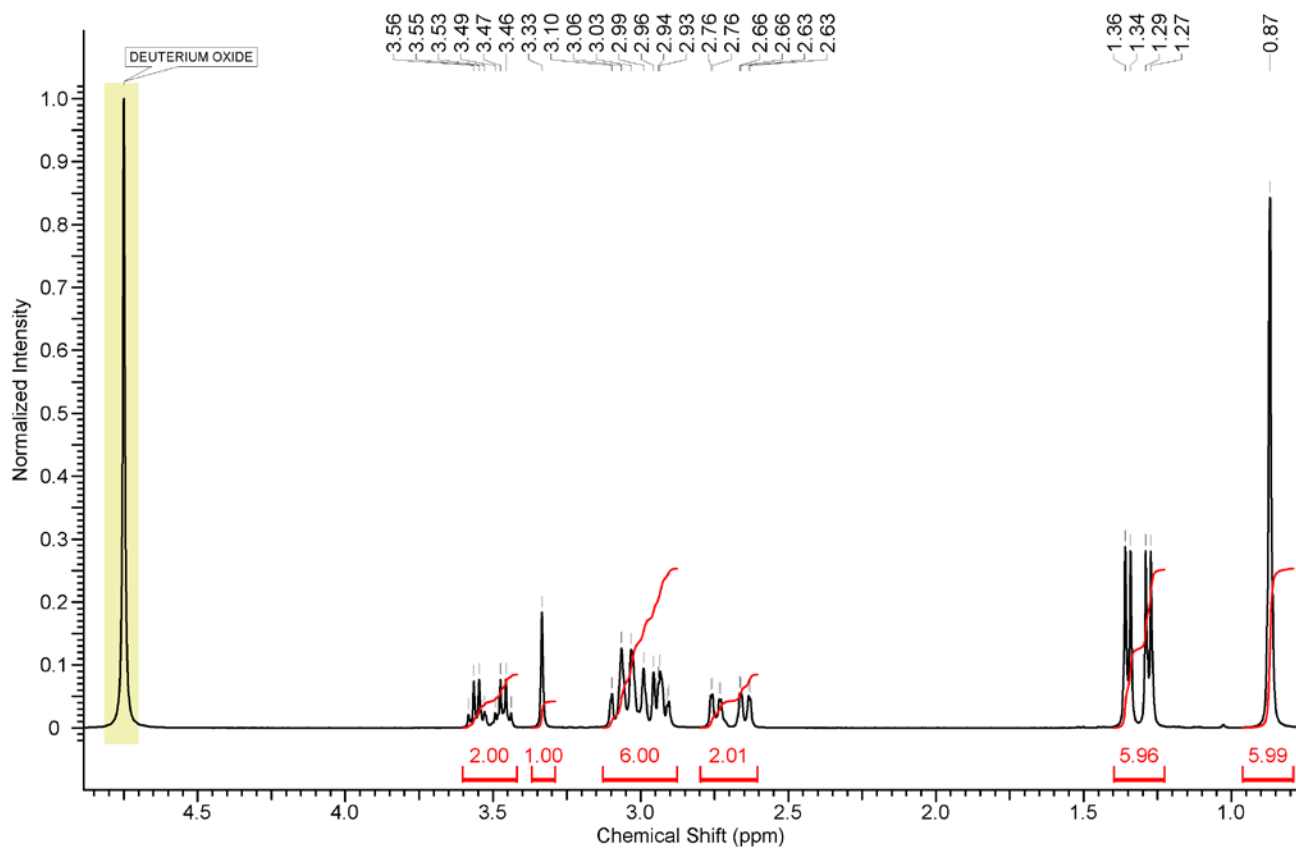

**Figure S34.**  $^1\text{H}$ -NMR spectrum of 2,2'-(1,5-dimethyl-9-hydroxy-3,7-diazabicyclo[3.3.1]nonane-3,7-diyl)dipropionic acid (**3c**) in water- $\text{d}_2$ .

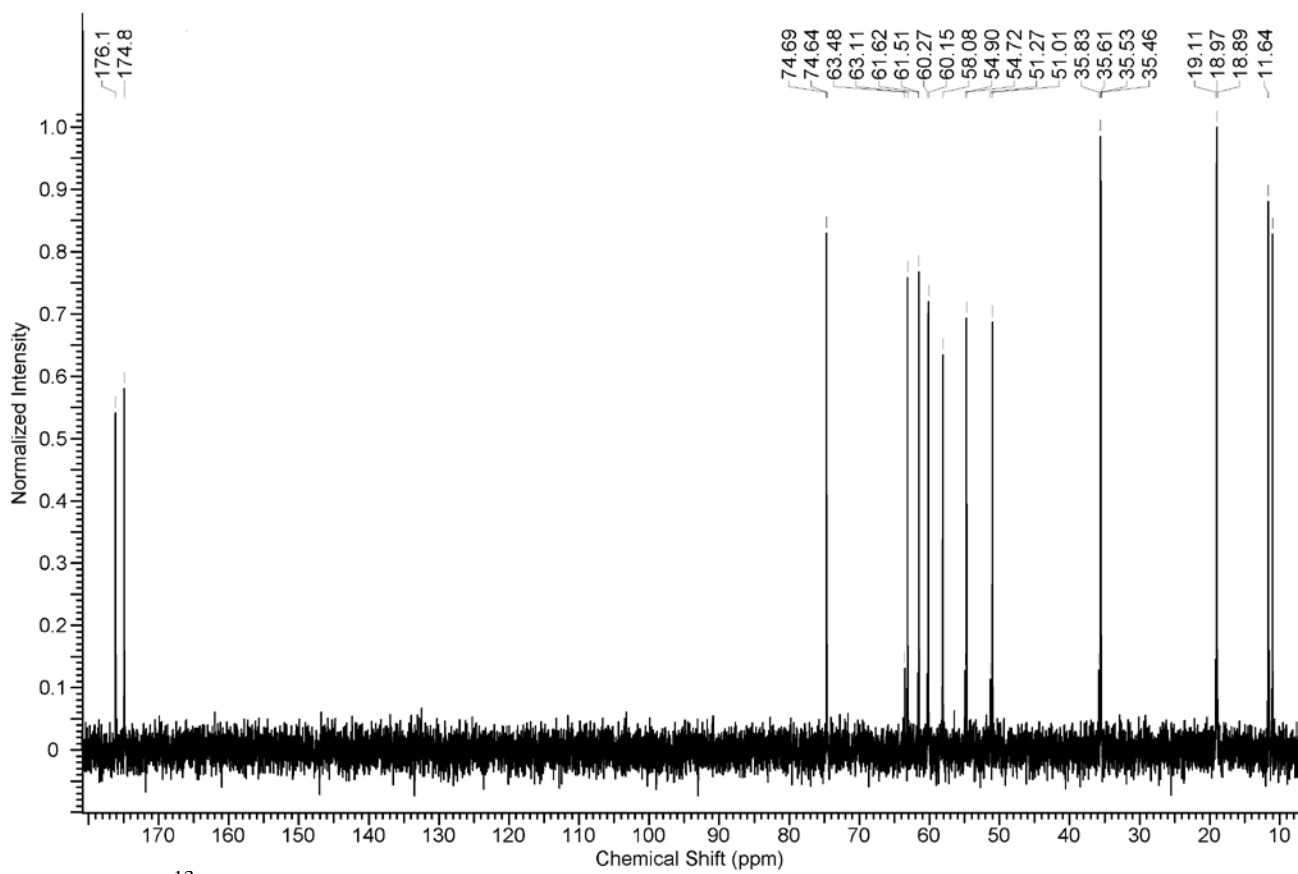

**Figure S35.**  $^{13}\text{C}$ -NMR spectrum of 2,2'-(1,5-dimethyl-9-hydroxy-3,7-diazabicyclo[3.3.1]nonane-3,7-diyl)dipropionic acid (**3c**) in water- $\text{d}_2$ .

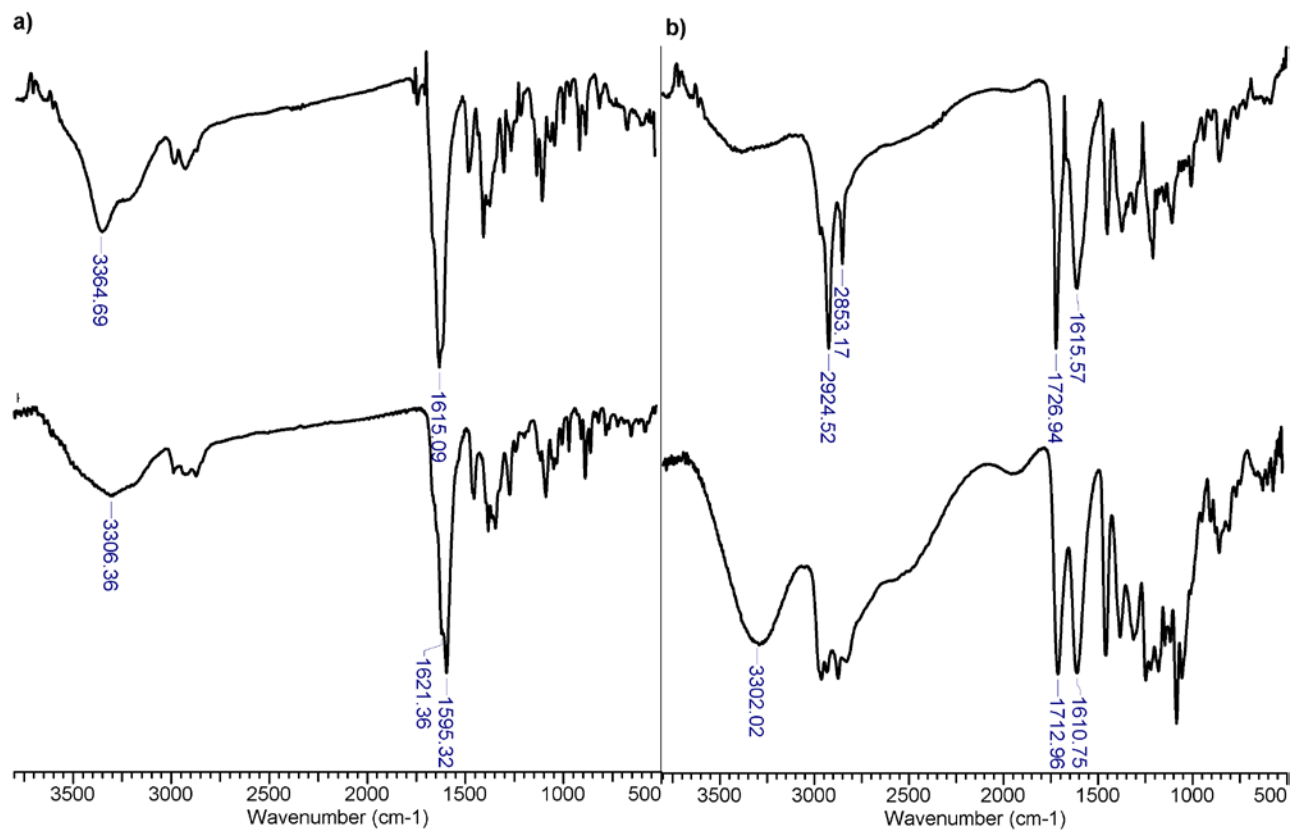

**Figure S36.** ATR-FTIR spectra of compounds **3b** and **5b** (a), **3c** and **5c** (b)

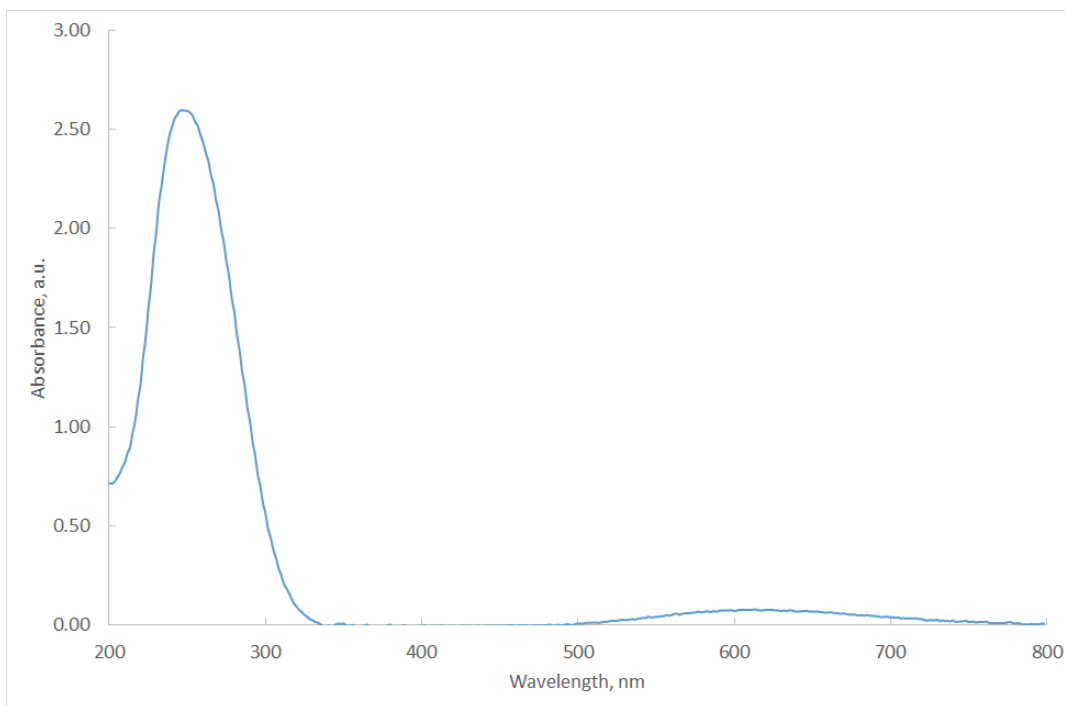

**Figure S37.** UV-vis spectrum of compound **4b** in methanol:water 1:1 solution. Concentration  $5.34 \cdot 10^{-4}$  mol/l.

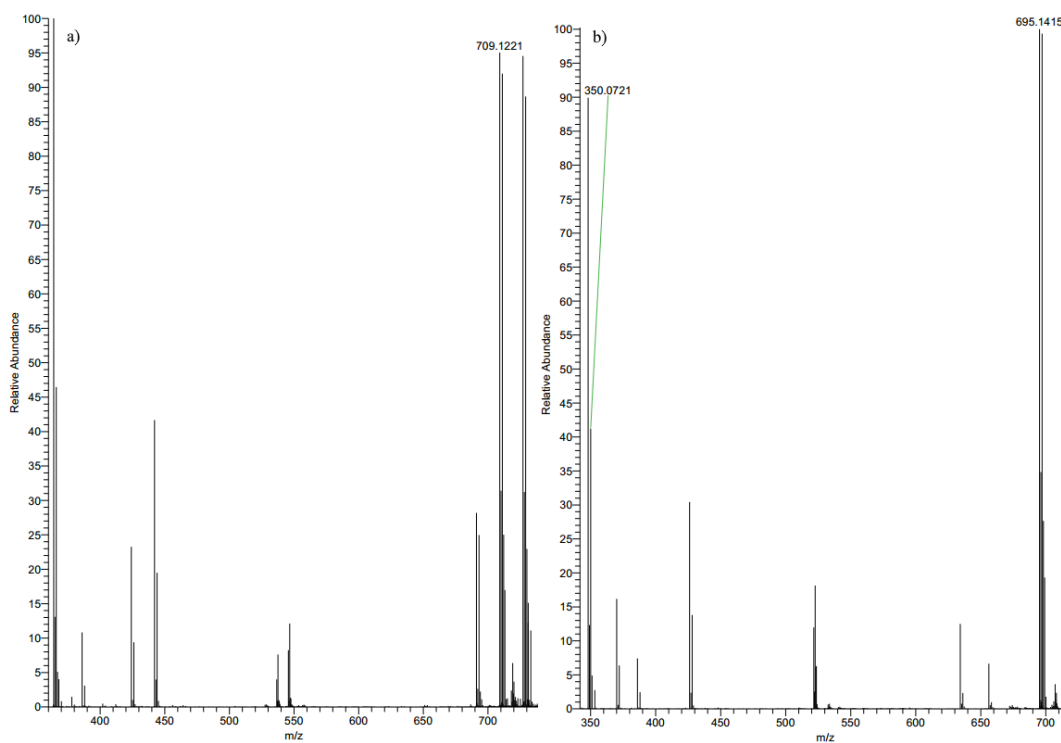

**Figure S38.** HRMS-ESI of copper complexes **4b** (a) and **4c** (b).

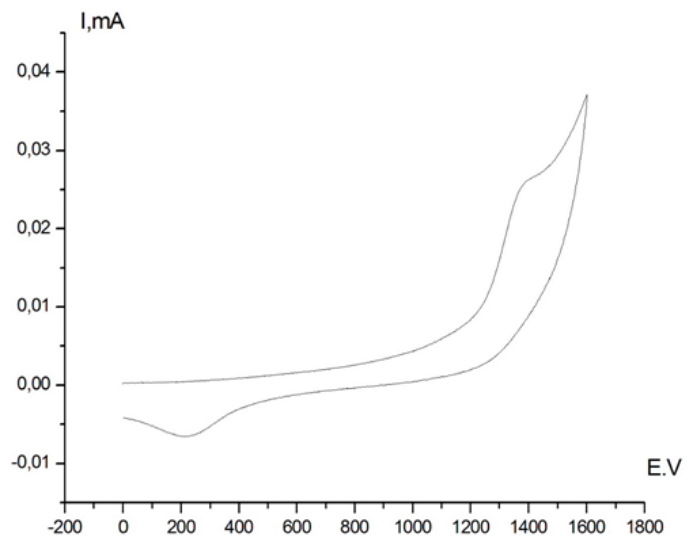

**Figure S39.** Cyclic voltammogram oxidation of complex **4c** (Pt electrode, DMF,  $\text{Bu}_4\text{NBF}_4$ ,  $\text{Ag}/\text{AgCl}/\text{KCl}$  (sat.),  $20\text{ }^\circ\text{C}$ )

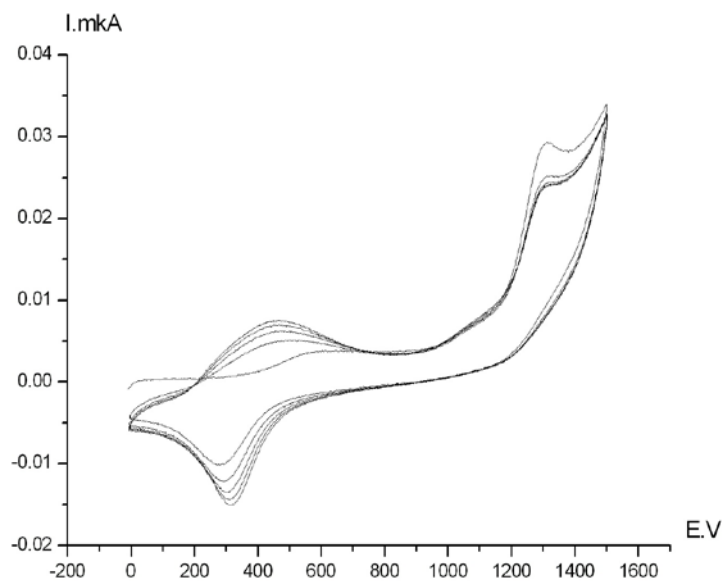

**Figure S40.** Cyclic voltammogram oxidation of complex **5c** (5 scan potential) (Pt electrode, DMF,  $\text{Bu}_4\text{NBF}_4$ ,  $\text{Ag}/\text{AgCl}/\text{KCl}$  (sat.),  $20\text{ }^\circ\text{C}$ )
